# Supplementary material
Source: Royal Society of Chemistry journal article supplement (doi:10.1039/d6tc00651e)
Supplement: d6tc00651e1.pdf [file d6tc00651e1.pdf]

## Supporting Information

### Hydrogel Infusion Additive Manufacturing of Customized Hierarchical Porous Cobalt/Carbon Composites for Electromagnetic Wave Absorption

Yurun Gao, Jingjing Xu\*, Hao Li, Jiaqi Liu, Dongxin Wang, Heng Zhang, Mingxing Piao, Xiao Wang, Chaolong Li\*, Haofei Shi

Chongqing Institute of Green and Intelligent Technology, Chinese Academy of Sciences, Chongqing 400714, China;

Chongqing School, University of Chinese Academy of Sciences, Chongqing 400714, China;

University of Chinese Academy of Sciences, Beijing 10049, China;

E-mail: xujingjing@cigit.ac.cn; lichaolong@cigit.ac.cn

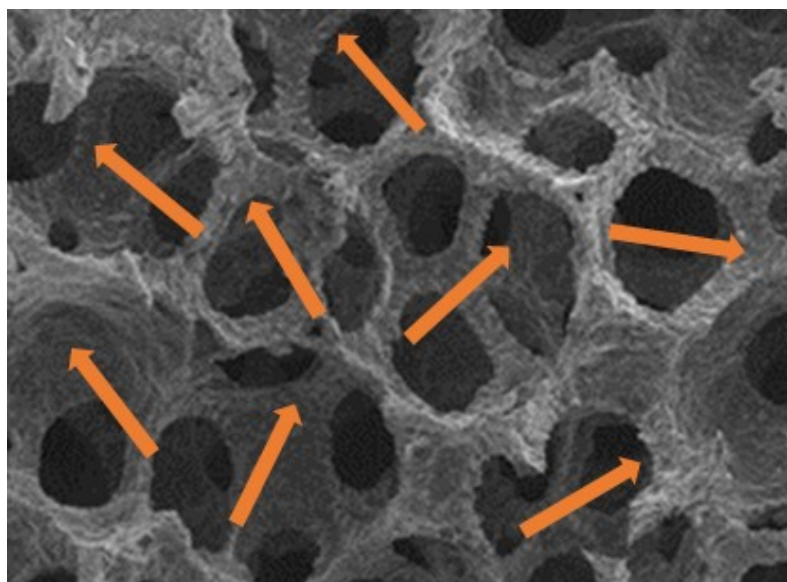

→ Electromagnetic wave

**Figure S1.** Schematic illustration of multiple reflections and scattering of incident electromagnetic waves inside the porous structure.

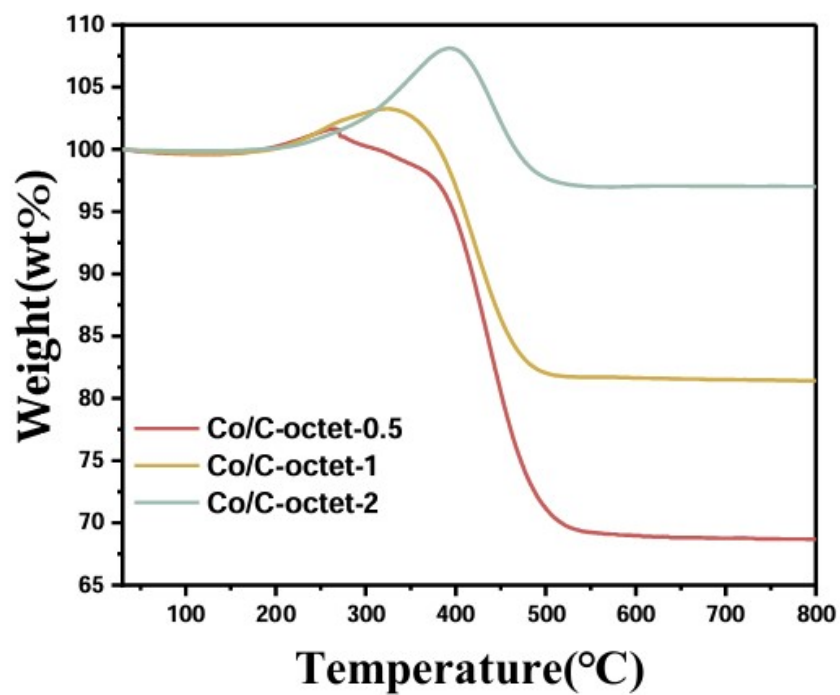

**Figure S2.** Thermogravimetric curves of Co/C-octet wave-absorbing materials with varying cobalt content.
